# Supplementary material for: Protective effect of maternal uteroplacental insufficiency on oxygen-induced retinopathy in offspring: removing bias of premature birth
Source: PubMed Central journal article supplement (PMC5307308; doi:10.1038/srep42301), 2017-02-14
Supplement: srep42301-s1.pdf [file srep42301-s1.pdf]

# **Title: Protective effect of maternal uteroplacental insufficiency on oxygen-induced retinopathy in offspring: removing bias of premature birth**

Authors: Silke Becker<sup>1</sup>, Haibo Wang<sup>1</sup>, Baifeng Yu<sup>2</sup>, Randy Brown<sup>1</sup>, Xiaokun Han<sup>1</sup>, Robert H. Lane<sup>3</sup>, M. Elizabeth Hartnett<sup>1</sup>

Affiliations: <sup>1</sup>John A. Moran Eye Center, University of Utah, Salt Lake City, Utah, USA; <sup>3</sup> Children's Hospital of Wisconsin, Milwaukee, Wisconsin, USA.

## **Corresponding author:**

M. Elizabeth Hartnett, MD.

Address: 65 N. Mario Capecchi Drive, Salt Lake City, UT 84132.

Tel: 801-213-4044; Fax: 801-581-3357

Email: [ME.Hartnett@hsc.utah.edu](mailto:ME.Hartnett@hsc.utah.edu)

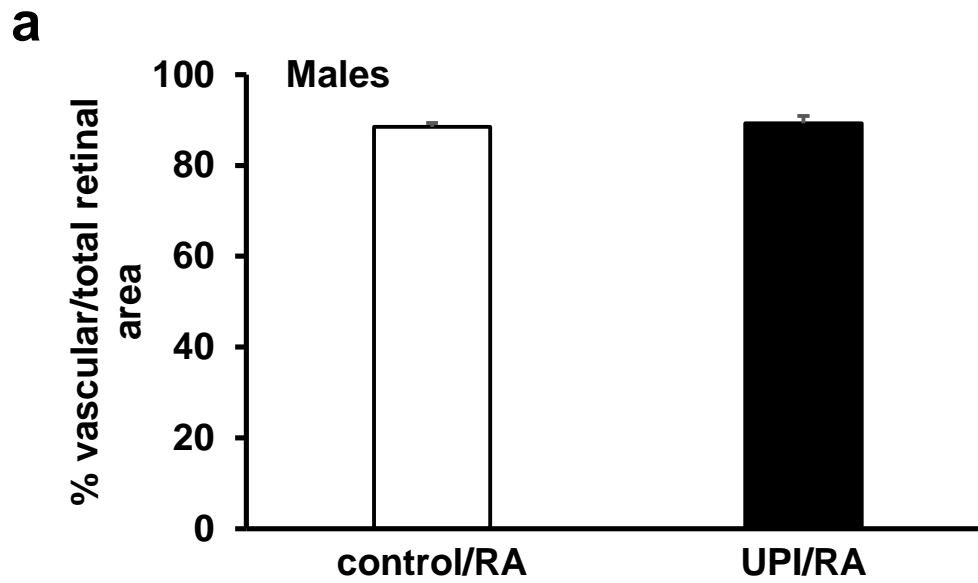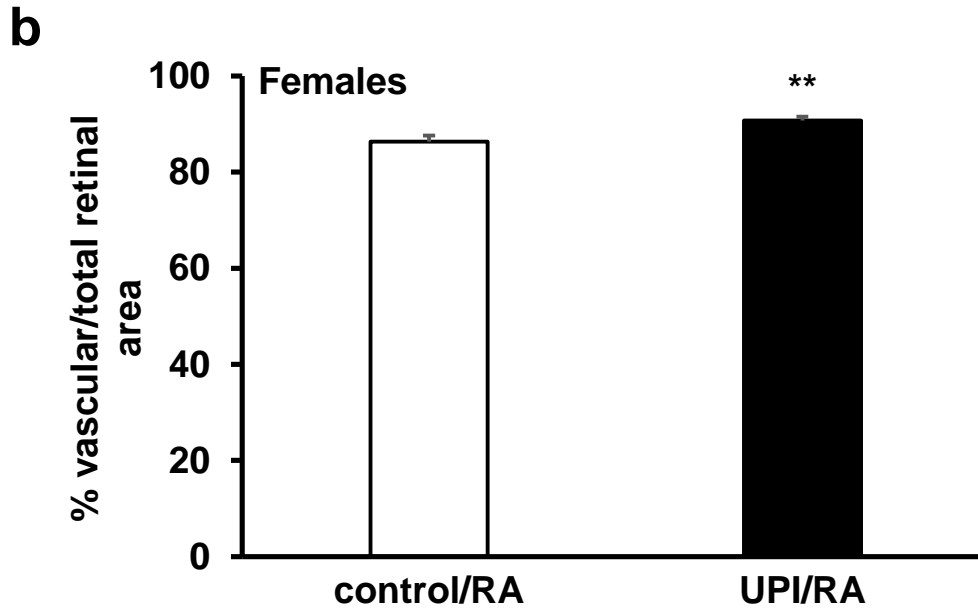

**Supplemental Figure 1:** Vascularized retinal area/total retinal area (%) in (a) Male and (b) Female Control/RA and UPI/RA pups at postnatal day 7.

## Supplemental Table 1: Definitions

|             |                                                                                           |
|-------------|-------------------------------------------------------------------------------------------|
| control/RA  | Pups born to dams exposed to anesthesia and raised in room air                            |
| UPI/RA      | Pups born to dams with UPI after bilateral uterine artery ligation and raised in room air |
| control/OIR | Pups born to dams exposed to anesthesia and OIR (Figure 3)                                |
| UPI/OIR     | Pups born to dams with UPI after bilateral uterine artery ligation and OIR (Figure 3)     |

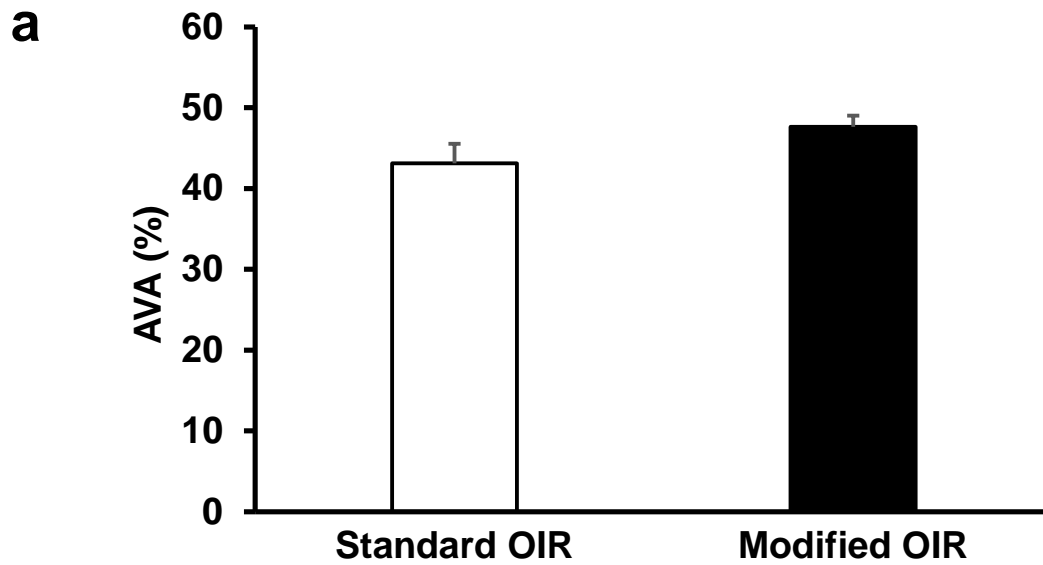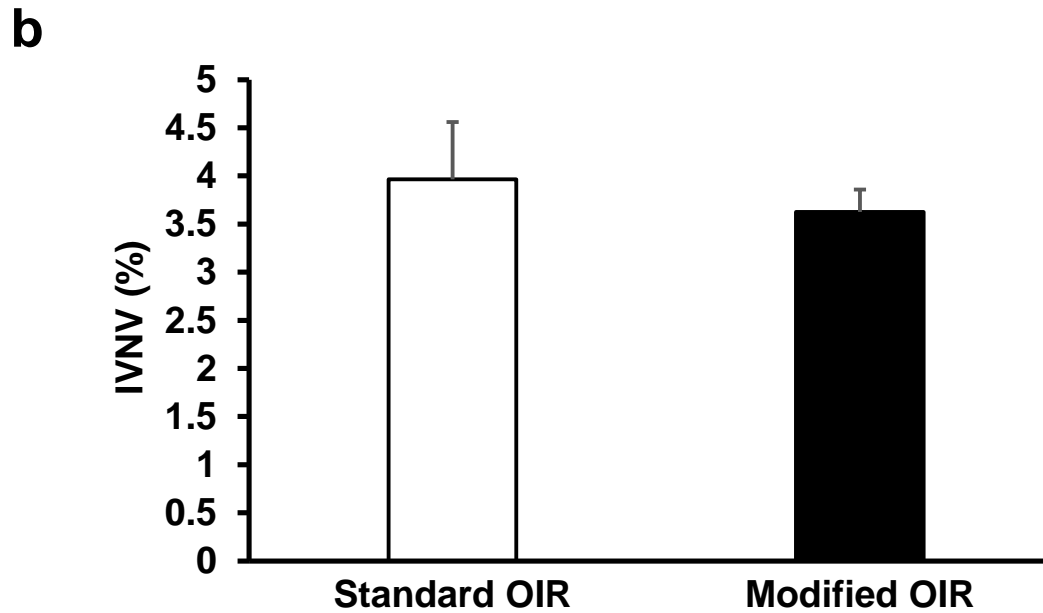

**Supplemental Figure 2:** Quantification of (a) AVA and (b) IVNV in models of standard OIR and modified OIR pups at postnatal day 18.5

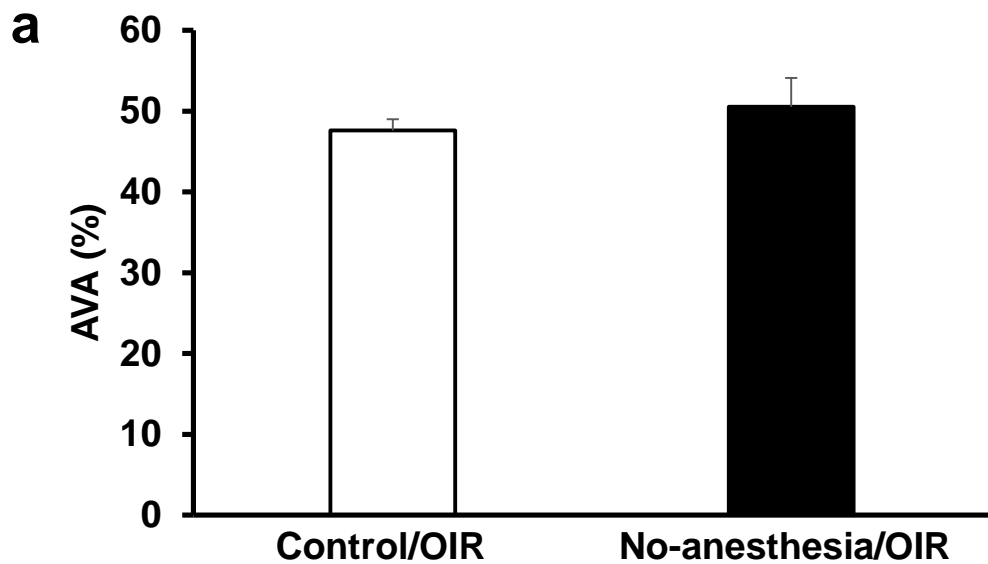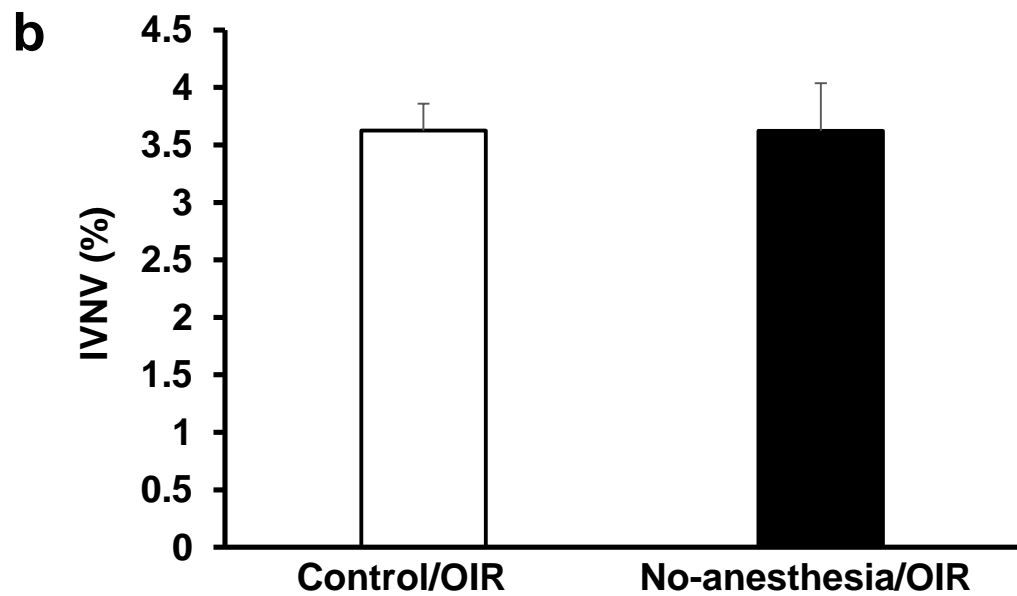

**Supplemental Figure 3:** Quantification of (a) AVA and (b) IVNV in Control/OIR and No-anesthesia/OIR pups at postnatal day 18.5

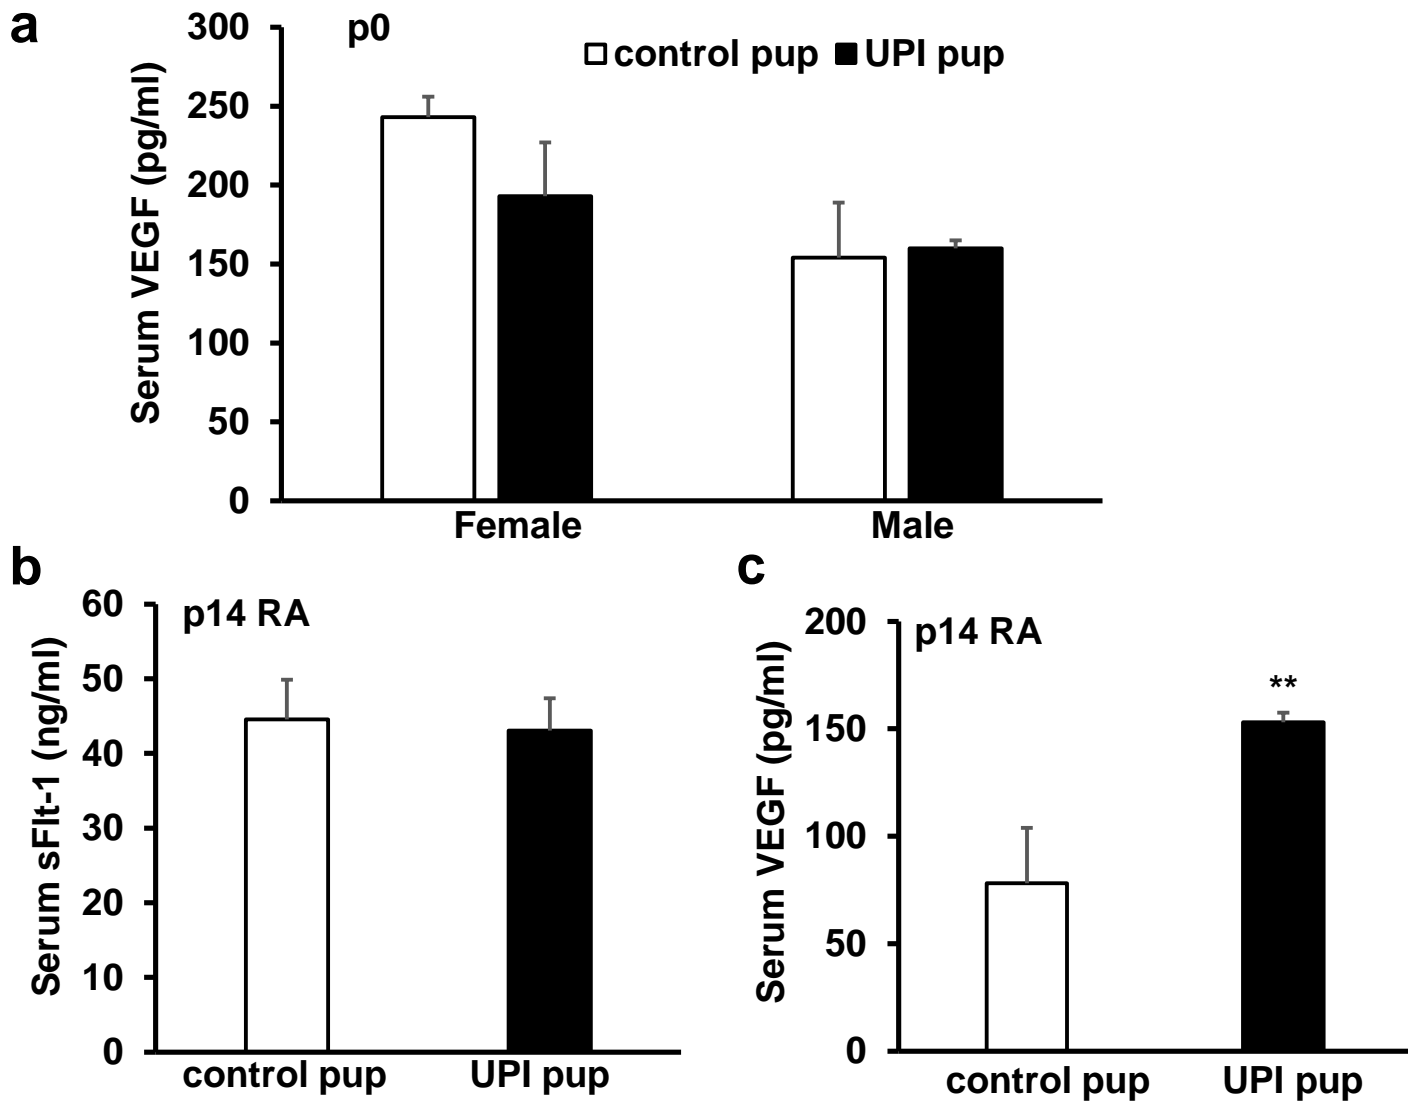

**Supplemental Figure 4.** (a) ELISA of serum VEGF in pups born to control or UPI dams at birth (p0), (b) ELISA of serum soluble Flt-1 (sFlt-1) and (c) ELISA of serum VEGF in room air pups at postnatal day 14 (p14RA) born to control or UPI dams (\*\* $p < 0.01$  vs. control pup).
